# Supplementary material for: Molecular polarization bridging physical and chemical enhancements in surface enhanced Raman scattering
Source: Royal Society of Chemistry journal article supplement (doi:10.1039/c1cc14962h), 2011-01-01
Supplement: c1cc14962h.pdf [file c1cc14962h.pdf]

# Supporting Information for: Molecular Polarization Bridging Physical and Chemical Enhancements in Surface Enhanced Raman Scattering

Sai Duan,<sup>a,b</sup> Xin Xu,<sup>\*c</sup> Yi Luo<sup>\*b</sup> and Zhong-Qun Tian<sup>a</sup>

<sup>a</sup> State Key Laboratory of Physical Chemistry of Solid Surface and Department of Chemistry, College of Chemistry and Chemical Engineering, Xiamen University, Xiamen, 361005, P. R. China

<sup>b</sup> Department of Theoretical Chemistry, School of Biotechnology, Royal Institute of Technology, S-106 91 Stockholm, Sweden. Fax: +46 (0)8 55378590; Tel: +46 (0)8 55378414; E-mail: luo@kth.se

<sup>c</sup> MOE Laboratory for Computational Physical Science, Department of Chemistry, Fudan University, Shanghai, 200433, P. R. China. Fax: +86 (0)21 65643529; Tel: +86 (0)21-65642032; E-mail: xxchem@fudan.edu.cn

## S1 Basic Theory

As discussed in the text, calculations of the actual electric field  $F^i$  felt by the adsorbed molecule and the derivatives of polarizabilities  $\partial\alpha^i/\partial Q$  where the molecule is interacting with the substrate under the SERS environment are critical issues to properly address the SERS enhancement mechanisms. Here we introduce a practical computational approach to calculate  $F^i$  and  $\partial\alpha^i/\partial Q$ , which can be conveniently applied to real molecular systems such as those shown in Fig. S1.

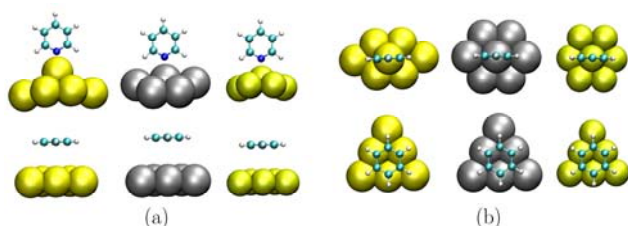

**Fig. S1** Optimized geometries of pyridine (top) and benzene (bottom) adsorbed on gold, silver, and copper substrates, from left to right, at the B3LYP/Sadlej pVTZ/Lan12dz level. (a) side view and (b) top view.

It shall be noted that these issues related to SERS actually share their common origin with the classical local field factor problem in linear and nonlinear optics.<sup>1,2</sup> In the latter case, a general computational approach with Onsager model for calculating polarizabilities and their derivatives has already been established.<sup>2</sup> We will first briefly recapture the method in the following in terms of SERS enhancement factor calculations.

In general, we could add solvation energy  $-\frac{1}{2}\sum_{mn}f_{mn}^R\mu_m\mu_n$ ,

where  $m, n \in \{x, y, z\}$ , of the Onsager model as the long range interaction energy between the adsorbate molecule and the substrate into the molecular polarizability calculations. Thus, if we neglect the contribution of hyperpolarizabilities, properties in the presence of SERS environment could be calculated as<sup>1</sup>

$$\begin{aligned}\mu^i &= \mu^{Loc} \\ F^R &= f^R \mu^{Loc} \\ \alpha^i &= \left( I - f^R \alpha^{Loc} \right)^{-1} \alpha^{Loc}\end{aligned}\quad (1.1)$$

where superscript “i” represents molecular properties under the SERS environment. Superscript “Loc” represents the extracted molecular properties from metal-molecule complex system, which contain only the short range chemical interaction. Superscript “R” represents properties generated by the polarization of the molecule. Here  $f^R$  denotes reaction field factor matrix in Onsager model and is given by<sup>3</sup>

$$f_{mn}^R = \frac{3}{\alpha_x \alpha_y \alpha_z} \frac{\kappa_m (1 - \kappa_m) (\epsilon_2 - \epsilon_1)}{\epsilon_2 + (\epsilon_1 - \epsilon_2) \kappa_m} \delta_{mn} \quad (1.2)$$

where  $\delta_{mn}$  is a  $\delta$  function,  $\alpha_x$ ,  $\alpha_y$ , and  $\alpha_z$  the principal axes of an ellipsoidal cavity,  $\epsilon_2$  the dielectric constant of bulk metal at the incident light wavelength,  $\epsilon_1$  the dielectric constant of the solution around molecules, and  $\kappa_m$  is defined as<sup>3</sup>

$$\kappa_m = \frac{\alpha_x \alpha_y \alpha_z}{2} \int_0^\infty \left[ \left( s + \alpha_x^2 \right) \left( s + \alpha_y^2 \right) \left( s + \alpha_z^2 \right) \right]^{-1/2} \left( s + \alpha_m^2 \right)^{-1} ds \quad (1.3)$$

In our calculations, the experimental dielectric constants for metals are employed for  $\epsilon_2$  and permittivity of vacuum is used for  $\epsilon_1$ .<sup>4</sup> We use spherical cavity for simplicity in the present work. The detailed calculations for molecular polarizabilities at such a semi-classical level, as well as the comparison with the exact self-consistent reaction field (SCRf) results are given in section S3.

The relationship between the actual electric field  $F^i$  felt by the adsorbed molecule and the field from the surface plasmon  $F^P$  induced by the incident light is  $F^i = F^P + F^R$ , where  $F^R$  is the reaction field generated by the polarization of the molecule.  $F^i$  and  $F^P$  are related in Onsager model by<sup>3</sup>

$$F^i = \left( I - f^R \alpha^i \right)^{-1} F^P \quad (1.4)$$

When no molecules are present,  $F^i$  and  $F^P$  are equivalent.

This indicates that the electric field obtained from the conventional finite-difference time-domain (FDTD) method is  $F^P$ , and it should be corrected by a physical coupling factor ( $G_{Coup}^{Phys}$ ) when calculating electric field enhancement of incident light,

$$G_{Coup}^{Phys} = \frac{|F^i|^2}{|F^P|^2} \quad (1.5)$$

Since electric field of the incident light is perpendicular to the metal surface,  $F^P$  only has its z component. Hence,  $G_{Coup}^{Phys}$  is calculated by

$$G_{Coup}^{Phys} = \left| \left( I - f^R \alpha^i \right)^{-1} \right|_{zz}^2 \quad (1.6)$$

Raman scattering factors are calculated as usual<sup>5</sup>

$$S_k = 45a_k'^2 + 7\gamma_k'^2 \quad (1.7)$$

where

$$a_k' = \frac{1}{3} \left[ (\bar{\alpha}_{xx}')_k + (\bar{\alpha}_{yy}')_k + (\bar{\alpha}_{zz}')_k \right]$$

$$\gamma_k'^2 = \frac{1}{2} \left\{ \left[ (\bar{\alpha}_{xx}')_k - (\bar{\alpha}_{yy}')_k \right]^2 + \left[ (\bar{\alpha}_{yy}')_k - (\bar{\alpha}_{zz}')_k \right]^2 + \left[ (\bar{\alpha}_{zz}')_k - (\bar{\alpha}_{xx}')_k \right]^2 + 6 \left[ (\bar{\alpha}_{xy}')_k^2 + (\bar{\alpha}_{yz}')_k^2 + (\bar{\alpha}_{zx}')_k^2 \right] \right\}$$

$$(\bar{\alpha}_{rs}')_k = \left( \frac{\partial \bar{\alpha}_{rs}}{\partial Q_k} \right)_0 \quad (1.8)$$

From the relationship between  $\alpha^i$  and  $\alpha^{Loc}$  in Eq. (1.1), we can obtain the derivative of  $\alpha^i$  as

$$\alpha^{i'} = \left( I - f^R \alpha^{Loc} \right)^{-1} f^R \alpha^{Loc'} \left( I - f^R \alpha^{Loc} \right)^{-1} \alpha^{Loc} + \left( I - f^R \alpha^{Loc} \right)^{-1} \alpha^{Loc'} \quad (1.9)$$

To obtain Eq. (1.9), we have assumed an independence of  $f^R$

with small nuclei motion. Once  $(\bar{\alpha}_{rs}')_k$  is obtained, the Raman scattering factors with long range interaction correction can be calculated by the same definition as in Eq. (1.7). The chemical part ( $G_{Coup}^{Chem}$ ) in the coupling enhancement ( $G_{Coup}$ ) is thus

defined as

$$G_{Coup,k}^{Chem} = \frac{S_k^i}{S_k^{Loc}} \quad (1.10)$$

## S2 Configurations for Pyridine and Benzene Adsorbed on Coinage Metal Substrates

Our strategy is to use cluster models to first consider the local chemical interactions between adsorbate molecule and substrate and then to include the long range interaction through the reaction field theory. We take the initial adsorption geometries from the

periodic boundary condition calculations where pyridine (py) and benzene (ben) are adsorbed on the face-centered cubic (FCC) (111) surfaces of gold, silver, and copper, respectively.<sup>6, 7</sup> Py-metal and Ben-metal complexes are restricted in the  $C_{2v}$  and  $C_{3v}$  symmetries, respectively. Full geometry optimizations are performed at the B3LYP level in conjunction with the Sadlej pVTZ basis sets<sup>8</sup> for carbon, nitrogen and hydrogen atoms and the Lanl2dz basis set for metal atoms as implemented in the Gaussian 03 suite of programs.<sup>9</sup> The optimized structures are depicted in Fig. S1. Analytical vibrational frequency calculations are carried out and Raman intensity calculations of all complexes are also performed at the same level. As noted before, small imaginary frequencies may exist, which were attributed to the integral errors in density functional theory calculations.<sup>10</sup>

## S3 Calculations of Polarizabilities of Adsorbate Molecules

The polarizabilities  $\alpha_{ab}$  can be calculated as<sup>11</sup>

$$\alpha_{ab} = \frac{\partial^2 E(tot)}{\partial F_a \partial F_b} \quad (1.11)$$

where  $E(tot)$  is the total energy of the whole complex system and  $F_a$  and  $F_b$  are the external electric fields along the  $a$  and  $b$  directions, respectively. We may decompose  $E(tot)$  of a metal-molecule complex system into three terms as

$$E(tot) = E_{Metal} + E_{Mol} + E_{Int} \quad (1.12)$$

where  $E_{Metal}$  denotes the energy calculated with the metal fragment alone, and  $E_{Mol}$  the energy calculated with the molecular fragment alone. We assume  $E_{Int}$ , the energy difference between  $E(tot)$  and  $(E_{Metal} + E_{Mol})$ , to be the interaction energy between metal and the molecular fragment in the complex. Hence the polarizabilities  $\alpha_{ab}$  of a metal-molecule complex system may be decomposed as

$$\alpha_{ab} = \alpha_{ab}^{Metal} + \alpha_{ab}^{Mol} \quad (1.13)$$

where  $\alpha_{ab}^{Metal} = \frac{\partial^2 E_{Metal}}{\partial F_a \partial F_b} + \frac{1}{2} \frac{\partial^2 E_{Int}}{\partial F_a \partial F_b}$  and  $\alpha_{ab}^{Mol} = \frac{\partial^2 E_{Mol}}{\partial F_a \partial F_b} + \frac{1}{2} \frac{\partial^2 E_{Int}}{\partial F_a \partial F_b}$ . In the conventional molecule-metal cluster model,

only short range local chemical bond interaction is properly included in  $\alpha_{ab}^{Mol}$ . Therefore, we denote the calculated  $\alpha^{Mol}$  in the conventional cluster model as  $\alpha^{Loc}$  defined above. The calculated molecular polarizabilities  $\alpha^{Loc}$  of adsorbed pyridine and benzene systems are listed in Table S1. For example,  $\alpha_{xx}$  in the Py-Au<sub>7</sub> cluster model is calculated to be 285.85  $a_0^3$ , while  $\frac{\partial^2 E_{Metal}}{\partial F_a \partial F_b}$  and  $\frac{\partial^2 E_{Mol}}{\partial F_a \partial F_b}$  are calculated to be 250.97 and 40.711  $a_0^3$ , respectively. Hence we can deduce the interaction contribution in  $\alpha_{xx}$  as 285.85 – (250.97 + 40.711) = -5.831  $a_0^3$ .

**Table S1** Calculated matrix elements of polarizabilities in  $a_0^3$  for pyridine or benzene adsorbed on coinage metal substrates: Py or Ben-Metal  $\left(\frac{\partial^2 E(tot)}{\partial F_a \partial F_b}\right)$ , metal  $\left(\frac{\partial^2 E_{Metal}}{\partial F_a \partial F_b}\right)$ , Py or Ben  $\left(\frac{\partial^2 E_{Mol}}{\partial F_a \partial F_b}\right)$ , and Py or Ben  $(\alpha^{Loc})$  at the B3LYP/Sadlej pVTZ/Lan12dz level.

| Species             | $\alpha_{xx}$ | $\alpha_{yx}$ | $\alpha_{yy}$ | $\alpha_{zx}$ | $\alpha_{zy}$ | $\alpha_{zz}$ |
|---------------------|---------------|---------------|---------------|---------------|---------------|---------------|
| Py-Au <sub>7</sub>  | 285.8500      | 0.0000        | 521.6200      | 0.0000        | 0.0000        | 334.0110      |
| Au <sub>7</sub>     | 250.9700      | 0.0000        | 463.8330      | 0.0000        | 0.0000        | 178.9580      |
| Py                  | 40.7110       | 0.0000        | 79.1800       | 0.0000        | 0.0000        | 74.2380       |
| Py $\alpha^{Loc}$   | 37.7955       | 0.0000        | 68.4835       | 0.0000        | 0.0000        | 114.6455      |
| Py-Ag <sub>7</sub>  | 395.9560      | 0.0000        | 519.6620      | 0.0000        | 0.0000        | 319.9150      |
| Ag <sub>7</sub>     | 367.8720      | 0.0000        | 464.6660      | 0.0000        | 0.0000        | 189.3360      |
| Py                  | 40.6970       | 0.0000        | 79.1290       | 0.0000        | 0.0000        | 74.2700       |
| Py $\alpha^{Loc}$   | 34.3905       | 0.0000        | 67.0625       | 0.0000        | 0.0000        | 102.4245      |
| Py-Cu <sub>7</sub>  | 373.7020      | 0.0000        | 375.6970      | 0.0000        | 0.0000        | 279.8220      |
| Cu <sub>7</sub>     | 340.6370      | 0.0000        | 320.7720      | 0.0000        | 0.0000        | 138.3960      |
| Py                  | 40.6980       | 0.0000        | 79.1100       | 0.0000        | 0.0000        | 74.2730       |
| Py $\alpha^{Loc}$   | 36.8815       | 0.0000        | 67.0175       | 0.0000        | 0.0000        | 107.8495      |
| Ben-Au <sub>6</sub> | 345.7900      | 0.0000        | 345.8270      | 0.0000        | 0.0150        | 187.8940      |
| Au <sub>6</sub>     | 291.6980      | 0.0000        | 291.6980      | 0.0000        | 0.0000        | 120.8840      |
| Ben                 | 83.3110       | 0.0000        | 83.3080       | 0.0000        | 0.0000        | 44.6610       |
| Ben $\alpha^{Loc}$  | 68.7015       | 0.0000        | 68.7185       | 0.0000        | 0.0075        | 55.8355       |
| Ben-Ag <sub>6</sub> | 407.8910      | 0.0000        | 407.9340      | 0.0000        | -0.0050       | 208.8480      |
| Ag <sub>6</sub>     | 353.8410      | 0.0000        | 353.8350      | 0.0000        | 0.0010        | 142.9280      |
| Ben                 | 83.3350       | 0.0000        | 83.3330       | 0.0000        | 0.0000        | 44.6690       |
| Ben $\alpha^{Loc}$  | 68.6925       | 0.0000        | 68.7160       | 0.0000        | -0.0030       | 55.2945       |
| Ben-Cu <sub>6</sub> | 327.3280      | 0.0000        | 327.3540      | 0.0000        | -0.0020       | 188.9510      |
| Cu <sub>6</sub>     | 273.1490      | 0.0000        | 273.1440      | 0.0000        | 0.0000        | 118.7970      |
| Ben                 | 83.3140       | 0.0000        | 83.3110       | 0.0000        | 0.0000        | 44.6600       |
| Ben $\alpha^{Loc}$  | 68.7465       | 0.0000        | 68.7605       | 0.0000        | -0.0010       | 57.4070       |

Therefore  $\alpha_{xx}^{Mol} = \alpha_{xx}^{Loc}$  is calculated as  $40.711 + 0.5 \times (-5.831) = 37.7955 a_0^3$ . For two states model, Jensen *et al.* have proposed a more rigorous way to get  $\alpha^{Mol}$  for such systems.<sup>12</sup> However, up to now, there has been no better method that can be easily used in general situation.

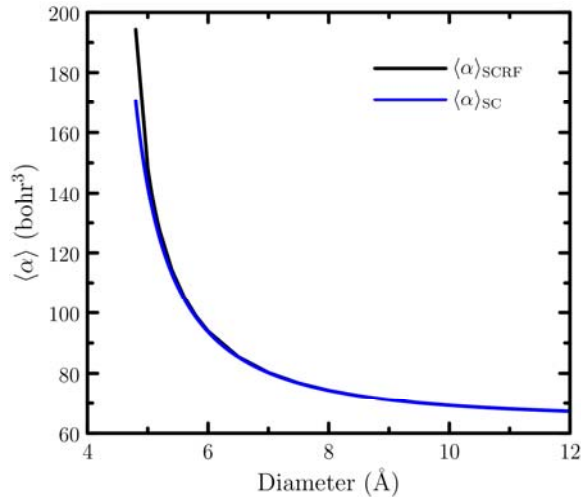

**Fig. S2** Calculated average polarizabilities  $\langle \alpha \rangle$ , i.e.  $\frac{1}{3}(\alpha_{xx} + \alpha_{yy} + \alpha_{zz})$ , of pyridine in  $a_0^3$  at the B3LYP/Sadlej pVTZ level. Comparison between the calculated values from the semi-classic method described in **S1** (blue line) and the exact values from the SCRf method (black line) at different cavity radii. The dielectric constant of the environment is set to be 6.9.

It is possible to consider the surrounding effect with the self-consistent reaction field (SCRf) method within the Onsager model when the molecule examined has a permanent dipole moment. We anticipate that the comparison between the calculated molecular polarizability with the SCRf method and that with the semi-classic method described in **S1** be satisfactory. As a small external electric field has negligible effect on the molecular electronic structure, the molecular electronic structure in the absence of an external electric field is used to calculate the molecular polarizability for this comparison depicted in Fig. S2. Discrepancy between the SCRf and semi-classic polarizabilities of pyridine is indeed small, and that for benzene should be even less than that of pyridine since the dipole moment of an adsorbed benzene is smaller than that of pyridine. These results guarantee that the numerical errors for the derivatives based on Eq. (1.9) be under control.

From Fig. S2 we notice that as the distance between nanoparticles become shorter, the discrepancy of molecular polarizabilities between adsorbed and free molecule becomes larger. According to the well-known Clausius-Mossotti formula<sup>3</sup>

$$\epsilon = \frac{1 + \frac{8\pi}{3} N\alpha}{1 - \frac{4\pi}{3} N\alpha} \quad (1.14)$$

the dielectric constant in the “hot-spots” in SERS should be very different from that of the bulk solution. This result indicates that using a uniform dielectric constant in electromagnetic field calculations can be questionable. It also gives a clue to build a nonuniform dielectric constant at the first principles level in

electromagnetic field calculations.

### S3 Physical and Chemical Components in the Coupling Enhancement Factor

Logarithm of normal mode independent  $G_{\text{Coupl}}^{\text{Phys}}$  calculated by using Eq. (1.6) is plotted in Fig. S3 for pyridine and benzene adsorbed on gold, silver, and copper substrates, respectively. There are two different extrema in Fig. S3 at different distances between nanoparticles. One is the maximum and the other the minimum. This result shows that the electric field of light is first increased by  $G_{\text{Coupl}}^{\text{Phys}}$  when the distance between nanoparticles becomes shorter and then decreased when the distance becomes even shorter. This provides an explanation how the adsorbed molecules can tune the surface plasmas, a phenomenon observed in some recent experiments.<sup>13</sup>

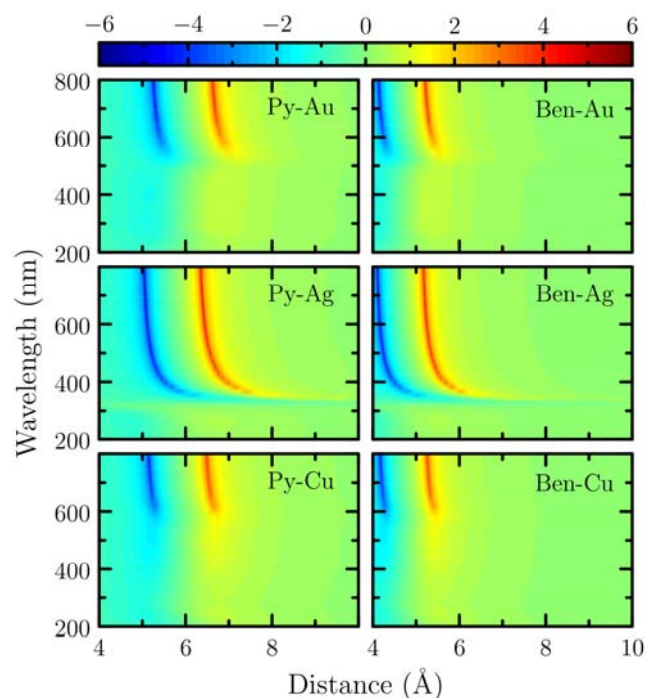

**Fig. S3** Logarithm of normal mode independent  $G_{\text{Coupl}}^{\text{Phys}}$  for pyridine (left) and benzene (right) adsorbed on gold, silver, and copper substrates from top to bottom. Excitation wavelength from 200 to 800 nm and distance between two nanoparticles from 4 to 10 Å are considered.

In order to discuss the general behavior and the order of magnitude of normal mode dependent  $G_{\text{Coupl}}^{\text{Chem}}$ , we have selected the ring breathing mode for pyridine or benzene adsorbed on gold, silver, and copper substrates. We plot logarithm in Fig. S4 for all calculated  $G_{\text{Coupl}}^{\text{Chem}}$  of this normal mode for these systems by using Eq. (1.10). From Fig. S4, we can see that, at certain distance between two nanoparticles,  $G_{\text{Coupl}}^{\text{Chem}}$  can become as large as  $10^6$  for both chemical (Py) and physical (Ben) adsorption systems. When molecules are chemically adsorbed on metal surfaces, the distance where  $G_{\text{Coupl}}^{\text{Chem}}$  becomes important is longer than that in

physisorption. Usually space occupied by molecule in physisorption is larger than that in chemisorption. Hence chemical coupling enhancement factor should play a more important role in chemisorption for SERS. In most situations,  $G_{\text{Coupl}}^{\text{Chem}}$  is larger than 1 and Raman intensity is generally increased by this factor.

The distance between nanoparticles where the  $G_{\text{Coupl}}^{\text{Phys}}$  maximum appears in chemisorption is longer than that in physisorption. As a result, SERS signals would be easier to be observed in chemisorption than they are in physisorption. This trend is in agreement with the experimental observation.<sup>14</sup> This reveals that physical enhancement dominates at larger distances between nanoparticles while at smaller distances chemical enhancement comes into play. We also notice that in the ultraviolet region of incident light, both  $G_{\text{Coupl}}^{\text{Phys}}$  and  $G_{\text{Coupl}}^{\text{Chem}}$  become less important. This should be attributed to interband transition of metal.<sup>4</sup>

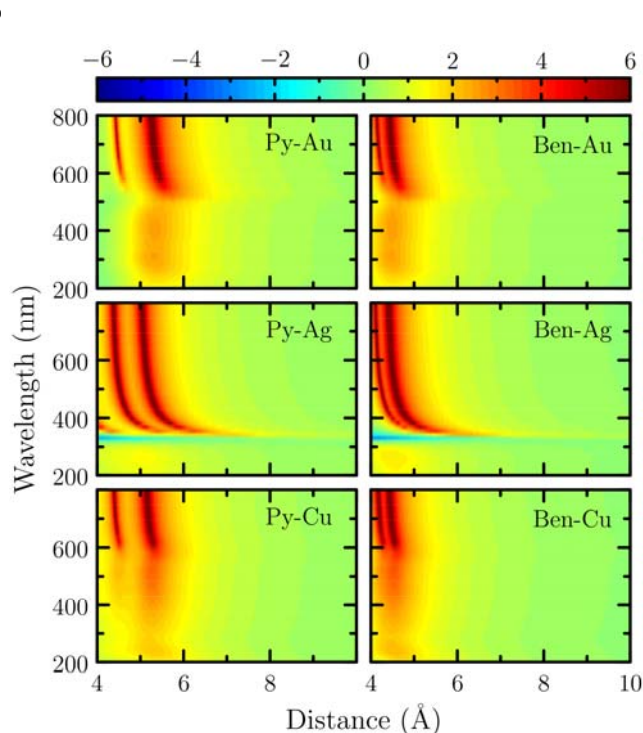

**Fig. S4** Logarithm of  $G_{\text{Coupl}}^{\text{Chem}}$  for ring breathing mode of pyridine (left) and benzene (right) adsorbed on gold, silver, and copper substrates from top to bottom. Excitation wavelength from 200 to 800 nm and distance between two nanoparticles from 4 to 10 Å are considered.

### Notes and references

1. Y. Luo, P. Norman, P. Macak and H. Agren, *J. Phys. Chem. A*, 2000, **104**, 4718-4722.
2. P. Macak, P. Norman, Y. Luo and H. Agren, *J. Chem. Phys.*, 2000, **112**, 1868-1875.
3. C. J. F. Bottcher, *Theory of Electric Polarization*, Elsevier: Amsterdam, 1973.
4. P. B. Johnson and R. W. Christy, *Phys. Rev. B*, 1972, **6**, 4370-4379.

5. J. Neugebauer, C. K. M. Reiher and B. A. Hess, *J. Comput. Chem.*, 2002, **23**, 895-910.
6. A. Bilic, J. R. Reimers and N. S. Hush, *J. Phys. Chem. B*, 2002, **106**, 6740-6747.
- 5 7. A. Bilic, J. R. Reimers, N. S. Hush, R. C. Hoft and M. J. Ford, *J. Chem. Theory Comput.*, 2006, **2**, 1093-1105.
8. A. J. Sadlej, *Collect. Czech. Chem. Commun.*, 1988, **53**, 1995-2016.
9. M. J. Frisch, G. W. Trucks, H. B. Schlegel, G. E. Scuseria, M. A. Robb, J. R. Cheeseman, Montgomery, Jr., J. A., T. Vreven, K. N. Kudin, J. C. Burant, J. M. Millam, S. S. Iyengar, J. Tomasi, V. Barone, B. Mennucci, M. Cossi, G. Scalmani, N. Rega, G. A. Petersson, H. Nakatsuji, M. Hada, M. Ehara, K. Toyota, R. Fukuda, J. Hasegawa, M. Ishida, T. Nakajima, Y. Honda, O. Kitao, H. Nakai, M. Klene, X. Li, J. E. Knox, H. P. Hratchian, J. B. Cross, V. Bakken, C. Adamo, J. Jaramillo, R. Gomperts, R. E. Stratmann, O. Yazyev, A. J. Austin, R. Cammi, C. Pomelli, J. W. Ochterski, P. Y. Ayala, K. Morokuma, G. A. Voth, P. Salvador, J. J. Dannenberg, V. G. Zakrzewski, S. Dapprich, A. D. Daniels, M. C. Strain, O. Farkas, D. K. Malick, A. D. Rabuck, K. Raghavachari, J. B. Foresman, J. V. Ortiz, Q. Cui, A. G. Baboul, S. Clifford, J. Cioslowski, B. B. Stefanov, G. Liu, A. Liashenko, P. Piskorz, I. Komaromi, R. L. Martin, D. J. Fox, T. Keith, M. A. Al-Laham, C. Y. Peng, A. Nanayakkara, M. Challacombe, P. M. W. Gill, B. Johnson, W. Chen, M. W. Wong, C. Gonzalez and J. A. Pople, Gaussian, Inc., Wallingford, CT, 2004.
- 15 25 10. L. Zhao, L. Jensen and G. C. Schatz, *J. Am. Chem. Soc.*, 2006, **128**, 2911-2919.
11. W. Koch and M. C. Holthausen, *A Chemist's Guide to Density Functional Theory*, Wiley-VCH Verlag GmbH, 2001.
- 30 12. S. M. Morton and L. Jensen, *J. Am. Chem. Soc.*, 2009, **131**, 4090-4098.
13. W. Ni, T. Ambjornsson, S. P. Apell, H. Chen and J. Wang, *Nano Lett.*, 2010, **10**, 77-84.
14. Z. Q. Tian, R. Bin and D. Y. Wu, *J. Phys. Chem. B*, 2002, **106**, 9463-9483.
- 35
